# Supplementary material
Source: PubMed Central journal article supplement (PMC8439179)
Supplement: NIHMS1737214-supplement-1.pdf [file NIHMS1737214-supplement-1.pdf]

## SUPPLEMENTARY MATERIALS

| <b>Repair mechanism</b> | <b>DNA damaging agent</b>     | <b>Relevant processing enzyme/chemical inhibitor</b> | <b>Relevant genetic variants</b>                                      |
|-------------------------|-------------------------------|------------------------------------------------------|-----------------------------------------------------------------------|
| BER                     | H <sub>2</sub> O <sub>2</sub> | Fpg (NEB)                                            | <i>Polβ</i> <sup>-/-</sup> , <i>Ogg1</i> <sup>-/-</sup>               |
| BER                     | MMS                           | hAAG (NEB)                                           | <i>Polβ</i> <sup>-/-</sup> , <i>Aag</i> <sup>-/-</sup> , <i>AagTg</i> |
| NER                     | UV                            | T4 endoV (NEB)                                       | <i>XPG</i> <sup>-/-</sup> ,                                           |
| NHEJ                    | IR                            | Scr7                                                 | <i>DNA-PKcs</i> mutant                                                |

Table S1. Repair pathways, DNA damaging agents, and relevant processing enzymes explored in this study.
